# Supplementary material
Source: PubMed Central journal article supplement (PMC2854331)
Supplement: mmc1.pdf [file mmc1.pdf]

# THE LANCET

## Supplementary webappendix

This webappendix formed part of the original submission and has been peer reviewed. We post it as supplied by the authors.

Supplement to: Sousa RM, Ferri CP, Acosta D, et al. Contribution of chronic diseases to disability in elderly people in countries with low and middle incomes: a 10/66 Dementia Research Group population-based survey. *Lancet* 2009; **374**: 1821–30.

**Table 1 – 10/66 DRG population-based study sample characteristics**

| Variables                              | Cuba       | DR         | Urban Peru | Rural Peru | Venezuela  | Urban Mexico | Rural Mexico | Urban China | Rural China | Urban India | Rural India |
|----------------------------------------|------------|------------|------------|------------|------------|--------------|--------------|-------------|-------------|-------------|-------------|
| <b>Age Mean (SD)</b>                   | 75.1 (7.0) | 75.2 (7.5) | 75 (7.4)   | 74.2 (7.3) | 72.5 (6.9) | 74.5 (6.6)   | 74.1 (6.7)   | 73.9 (6.1)  | 72.4 (6.0)  | 71.3 (6.1)  | 72.6 (5.8)  |
| <b>Gender</b>                          |            |            |            |            |            |              |              |             |             |             |             |
| Female                                 | 65% (1913) | 66% (1325) | 64% (888)  | 53% (295)  | 63% (1226) | 66% (666)    | 60% (602)    | 57% (661)   | 55% (556)   | 58% (571)   | 55% (545)   |
| Male                                   | 35% (1031) | 34% (684)  | 36% (493)  | 47% (257)  | 37% (706)  | 34% (337)    | 40% (398)    | 43% (499)   | 45% (446)   | 42% (419)   | 45% (454)   |
| Missing                                | 0          | 2          | 0          | 0          | 33         | 0            | 0            | 0           | 0           | 15          | 0           |
| <b>Marital Status</b>                  |            |            |            |            |            |              |              |             |             |             |             |
| Never married                          | 9% (275)   | 7% (139)   | 11% (145)  | 12% (68)   | 10% (189)  | 6% (63)      | 4% (42)      | 0.3% (3)    | 2.2% (22)   | 2% (21)     | 0.5% (5)    |
| Married/<br>Cohabiting                 | 43% (1271) | 29% (586)  | 57% (784)  | 56% (308)  | 48% (921)  | 47% (470)    | 54% (538)    | 71.5% (829) | 58.4% (585) | 52% (523)   | 48% (481)   |
| Widowed                                | 32% (928)  | 41% (806)  | 27% (367)  | 29% (157)  | 29% (549)  | 39% (395)    | 37% (371)    | 28% (326)   | 39.3% (394) | 43% (426)   | 50% (497)   |
| Divorced                               | 16% (462)  | 23% (465)  | 5% (75)    | 3% (18)    | 13% (261)  | 8% (75)      | 5% (48)      | 0.2% (2)    | 0.1% (1)    | 3% (32)     | 1.5% (16)   |
| Missing                                | 8          | 15         | 10         | 1          | 45         | 0            | 1            | 0           | 0           | 3           | 0           |
| <b>Education</b>                       |            |            |            |            |            |              |              |             |             |             |             |
| None                                   | 3% (75)    | 20% (392)  | 3% (37)    | 15% (84)   | 8% (156)   | 23% (227)    | 33% (327)    | 20% (232)   | 58% (579)   | 43% (428)   | 66% (660)   |
| Some, not completed<br>primary         | 22% (655)  | 51% (1022) | 7% (90)    | 26% (141)  | 23% (445)  | 35% (354)    | 51% (510)    | 13% (153)   | 11% (114)   | 23% (234)   | 19% (195)   |
| Completed primary                      | 33% (979)  | 19% (370)  | 33% (460)  | 49% (267)  | 50% (965)  | 23% (229)    | 12% (122)    | 26% (303)   | 26% (259)   | 21% (212)   | 12% (116)   |
| Completed secondary/<br>tertiary       | 42% (1227) | 10% (208)  | 57% (786)  | 10% (52)   | 19% (359)  | 19% (191)    | 4% (41)      | 41% (472)   | 5% (50)     | 13% (129)   | 3% (28)     |
| Missing                                | 8          | 19         | 8          | 8          | 40         | 2            | 41           | 0           | 0           | 2           | 0           |
| Self-reported<br>health 'bad/very bad' | 9% (271)   | 9% (186)   | 5% (70)    | 2% (11)    | 5% (87)    | 9% (87)      | 8% (84)      | 4% (42)     | 4% (42)     | 5% (46)     | 10% (97)    |
| Missing                                | 9          | 2          | 7          | 1          | 46         | 1            | 0            | 0           | 0           | 2           | 0           |
| <b>Lives alone</b>                     | 9% (261)   | 13% (254)  | 3% (45)    | 8% (44)    | 3% (61)    | 11% (106)    | 11% (112)    | 5% (54)     | 5% (49)     | 4% (44)     | 12% (120)   |
| Missing                                | 0          | 0          | 0          | 0          | 0          | 0            | 0            | 0           | 0           | 0           | 0           |

Data are % (N), unless otherwise stated. DR= Dominican Republic
